# Supplementary material for: A new spacer-induced organization in highly ordered tin-based hybrid materials
Source: Royal Society of Chemistry journal article supplement (doi:10.1039/b901757g), 2009-01-01
Supplement: b901757g.pdf [file b901757g.pdf]

Supplementary Material (ESI) for Dalton Transactions

## A new spacer-induced organization in highly ordered tin-based hybrid materials

Hicham Elhamzaoui, Bernard Jousseume,\* Thierry Toupance and Cécile Zakri

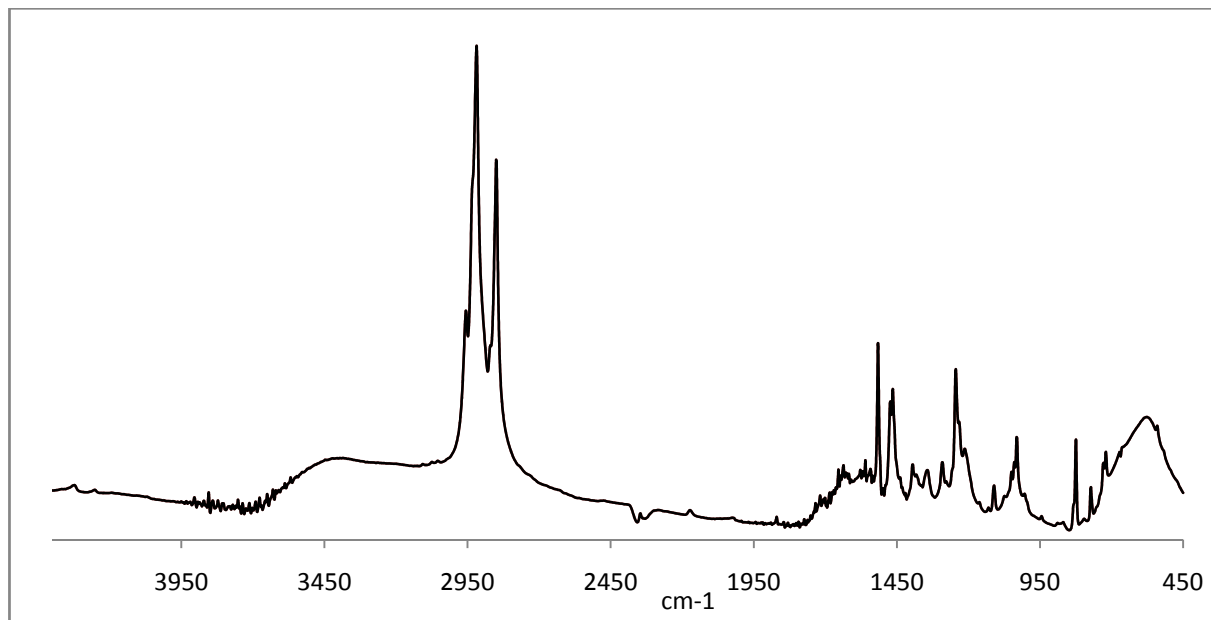

Infrared spectrum of **5**

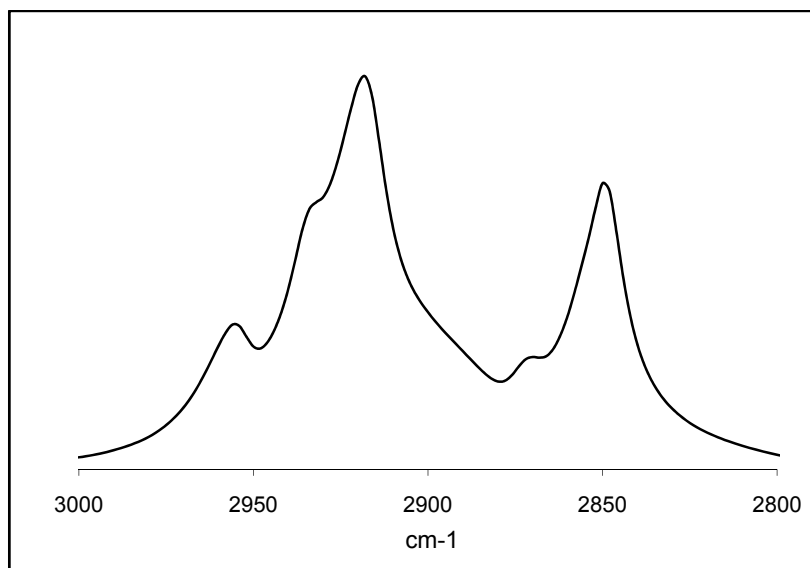

Infrared spectrum of **5** (part)

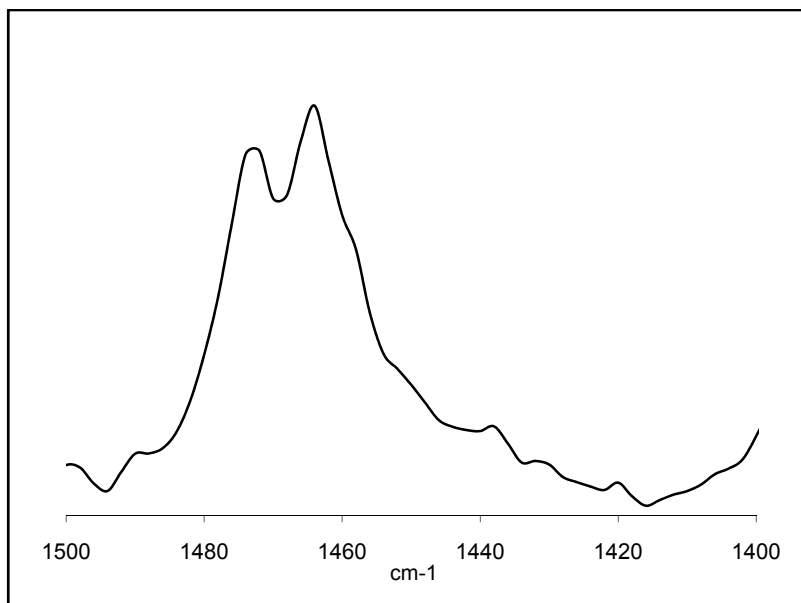

Infrared spectrum of **5** (part)

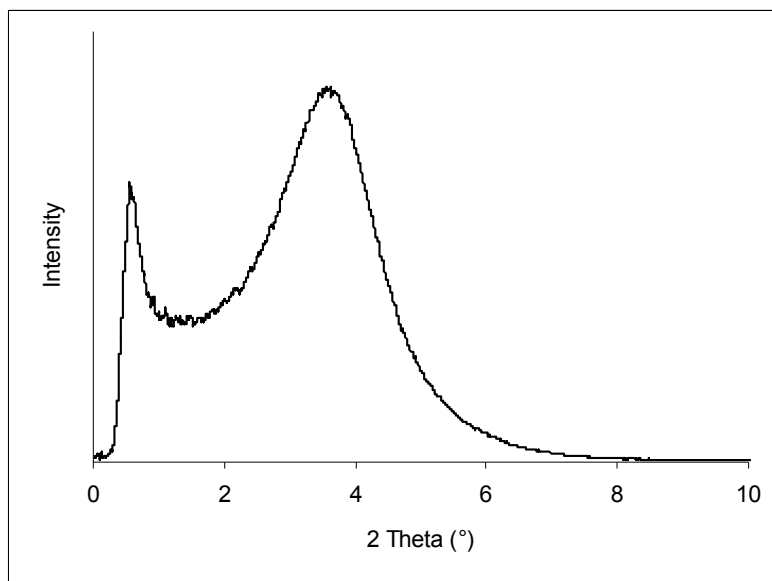

X-ray powder diffraction pattern of **4**.
